# Supplementary material
Source: publisher figshare collection journal article supplement (https://acs.figshare.com/ndownloader/files/4489741)
Supplement: Supplementary file 1 [file 4489741]

 
data_ba80gas 
 
_audit_creation_method            SHELXL-97 
_audit_update_record 
; 
? 
; 
 
_chemical_name_systematic 
; 
? 
; 
 
_chemical_name_common            ? 
_chemical_melting_point          ? 
_chemical_formula_moiety         'C27 H44 F O2 P Pd Si ' 
_chemical_formula_sum 
 'C27 H44 F O2 P Pd Si' 
_chemical_formula_structural     ? 
_chemical_formula_weight          585.08 
 
_chemical_absolute_configuration ? 
_chemical_formula_iupac          ? 
_chemical_formula_analytical     ? 
_chemical_compound_source        ? 
 
loop_ 
 _atom_type_symbol 
 _atom_type_description 
 _atom_type_scat_dispersion_real 
 _atom_type_scat_dispersion_imag 
 _atom_type_scat_source 
 'C'  'C'   0.0033   0.0016 
 'International Tables Vol C Tables 4.2.6.8 and 6.1.1.4' 
 'H'  'H'   0.0000   0.0000 
 'International Tables Vol C Tables 4.2.6.8 and 6.1.1.4' 
 'O'  'O'   0.0106   0.0060 
 'International Tables Vol C Tables 4.2.6.8 and 6.1.1.4' 
 'F'  'F'   0.0171   0.0103 
 'International Tables Vol C Tables 4.2.6.8 and 6.1.1.4' 
 'Si'  'Si'   0.0817   0.0704 
 'International Tables Vol C Tables 4.2.6.8 and 6.1.1.4' 
 'P'  'P'   0.1023   0.0942 
 'International Tables Vol C Tables 4.2.6.8 and 6.1.1.4' 
 'Pd'  'Pd'  -0.9988   1.0072 
 'International Tables Vol C Tables 4.2.6.8 and 6.1.1.4' 
 
_symmetry_cell_setting           'Monoclinic' 
_symmetry_space_group_name_H-M   'C2/c  ' 
_symmetry_space_group_name_Hall  '-C 2yc' 
 
loop_ 
 _symmetry_equiv_pos_as_xyz 
 'x, y, z' 
 '-x, y, -z+1/2' 
 'x+1/2, y+1/2, z' 
 '-x+1/2, y+1/2, -z+1/2' 
 '-x, -y, -z' 
 'x, -y, z-1/2' 
 '-x+1/2, -y+1/2, -z' 
 'x+1/2, -y+1/2, z-1/2' 
 
_cell_length_a                    25.0154(13) 
_cell_length_b                    11.3144(6) 
_cell_length_c                    22.0186(11) 
_cell_angle_alpha                 90.00 
_cell_angle_beta                  109.649(2) 
_cell_angle_gamma                 90.00 
_cell_volume                      5869.1(5) 
_cell_formula_units_Z             8 
_cell_measurement_temperature     193(2) 
_cell_measurement_reflns_used    8415 
_cell_measurement_theta_min        2.35 
_cell_measurement_theta_max       23.71 
_exptl_crystal_description       'needles' 
_exptl_crystal_colour            'yellow' 
_exptl_crystal_size_max          0.266 
_exptl_crystal_size_mid          0.14 
_exptl_crystal_size_min          0.123 
_exptl_crystal_density_meas      ? 
_exptl_crystal_density_diffrn     1.324 
_exptl_crystal_density_method    'not measured' 
_exptl_crystal_F_000              2448 
_exptl_crystal_id                ba80gas 
 
_exptl_crystal_preparation 
; 
The data crystal was mounted using oil (Parantone-N, Exxon) to a 
0.3 mm cryo-loop (Hampton Research) with the (0 -1 1) scattering 
planes roughly normal to the spindle axis. 
; 
_exptl_absorpt_coefficient_mu     0.754 
_exptl_absorpt_correction_type   'integration' 
_exptl_absorpt_correction_T_min  0.8649 
_exptl_absorpt_correction_T_max  0.9473 
_exptl_absorpt_process_details   'SHELXTL/XPREP V2005/2 (Bruker, 2005)' 
 
_exptl_special_details 
; 
 One distinct cell was identified using APEX2 
(Bruker, 2004) .  Six 
frame series were integrated and filtered for statistical outliers 
using SAINT (Bruker, 2005) then corrected for absorption by 
integration using SHELXTL/XPREP V2005/2 (Bruker, 2005) before using 
SAINT/SADABS (Bruker, 2005) to sort, merge, and scale 
the combined data.  No decay correction was applied. 
; 
 
_diffrn_ambient_temperature       193(2) 
_diffrn_radiation_wavelength      0.71073 
_diffrn_radiation_wavelength_id  ba80gas 
_diffrn_radiation_type           'MoK\a' 
_diffrn_radiation_source         'fine-focus sealed tube' 
_diffrn_radiation_monochromator  'graphite' 
_diffrn_measurement_device_type   ? 
_diffrn_measurement_device       'Bruker Kappa/ApexII CCD' 
_diffrn_measurement_method       'profile data from \f and \w scans' 
_diffrn_detector_area_resol_mean  ? 
_diffrn_standards_number         ? 
_diffrn_standards_interval_count  ? 
_diffrn_standards_interval_time  ? 
 
_diffrn_standards_decay_%        ? 
_diffrn_reflns_number            48461 
 
_diffrn_reflns_av_R_equivalents   0.0613 
_diffrn_reflns_av_sigmaI/netI     0.0338 
_diffrn_reflns_limit_h_min        -30 
_diffrn_reflns_limit_h_max        30 
_diffrn_reflns_limit_k_min        -13 
_diffrn_reflns_limit_k_max        13 
_diffrn_reflns_limit_l_min        -26 
_diffrn_reflns_limit_l_max        26 
_diffrn_reflns_theta_min          1.96 
_diffrn_reflns_theta_max          25.39 
_reflns_number_total              5412 
_reflns_number_gt                 4360 
_reflns_threshold_expression      >2sigma(I) 
 
_computing_data_collection       'APEX2 V2.0-1 (Bruker, 2004)' 
 
_computing_cell_refinement       'SAINT V7.23A (Bruker, 2005)' 
_computing_data_reduction 
; 
SAINT V7.23A, XPREP V2005/2, SADABS V2007/4, TWINABS V2007/5 
(Bruker, 2005 & 2007) 
; 
_computing_structure_solution    'SHELXTL V6.12 (Bruker, 2005)' 
_computing_structure_refinement  'SHELXTL V6.12 (Bruker, 2005)' 
_computing_molecular_graphics 
; 
SHELXTL V6.12 (Bruker, 2005), CrystalMaker v2.1.3 (CrystalMaker, 1994) 
; 
_computing_publication_material  'XCIF V6.12 (Bruker, 2005)' 
 
_refine_special_details 
; 
Structure was phased by direct methods (Sheldrick, 
2008).  Systematic conditions suggested the ambiguous space group. 
The space group choice was confirmed by successful convergence of the 
full-matrix least-squares refinement on F^2^.  The highest peaks in 
the final difference Fourier map were in the vicinity of atoms Si1, 
C21, C9, P1, Pd1, C13, and C5; the final map had no other significant 
features.  A final analysis of variance between observed and 
calculated structure factors showed some dependence on amplitude and 
little dependence resolution. 
 
The acicular parent crystals were extremely difficult to cut without 
damaging the crystal parallel to the a-axis.  The data crystal was 
much longer than ideal; however, the mosaicity of shorter crystals 
damaged by the cutting process was too broad for data collection. 
; 
 
_refine_ls_structure_factor_coef  Fsqd 
_refine_ls_matrix_type            full 
_refine_ls_weighting_scheme       calc 
_refine_ls_weighting_details 
 'calc w=1/[\s^2^(Fo^2^)+(0.0288P)^2^+5.0000P] where P=(Fo^2^+2Fc^2^)/3' 
_atom_sites_solution_primary      direct 
_atom_sites_solution_secondary    difmap 
_atom_sites_solution_hydrogens    geom 
_refine_ls_hydrogen_treatment    noref 
_refine_ls_extinction_method      none 
_refine_ls_extinction_coef        ? 
_refine_ls_number_reflns          5412 
_refine_ls_number_parameters      310 
_refine_ls_number_restraints      0 
_refine_ls_R_factor_all           0.0429 
_refine_ls_R_factor_gt            0.0281 
_refine_ls_wR_factor_ref          0.0668 
_refine_ls_wR_factor_gt           0.0611 
_refine_ls_goodness_of_fit_ref    1.029 
_refine_ls_restrained_S_all       1.029 
_refine_ls_shift/su_max           0.001 
_refine_ls_shift/su_mean          0.000 
 
_refine_ls_abs_structure_details ? 
loop_ 
 _atom_site_label 
 _atom_site_type_symbol 
 _atom_site_fract_x 
 _atom_site_fract_y 
 _atom_site_fract_z 
 _atom_site_U_iso_or_equiv 
 _atom_site_adp_type 
 _atom_site_occupancy 
 _atom_site_symmetry_multiplicity 
 _atom_site_calc_flag 
 _atom_site_refinement_flags 
 _atom_site_disorder_assembly 
 _atom_site_disorder_group 
Pd1 Pd 0.112813(8) 0.192822(17) 0.063500(9) 0.02702(7) Uani 1 1 d . . . 
P1 P 0.12255(3) 0.32868(5) 0.14168(3) 0.02562(15) Uani 1 1 d . . . 
Si1 Si 0.14289(3) -0.00774(7) -0.02685(4) 0.0368(2) Uani 1 1 d . . . 
F1 F 0.05246(8) -0.24890(15) 0.18311(10) 0.0616(5) Uani 1 1 d . . . 
O1 O 0.10692(7) 0.10462(16) -0.01807(8) 0.0358(4) Uani 1 1 d . . . 
O2 O 0.39186(8) 0.05125(19) 0.13426(9) 0.0466(5) Uani 1 1 d . . . 
C1 C 0.14183(12) 0.4552(2) 0.09575(13) 0.0339(6) Uani 1 1 d . . . 
C2 C 0.20432(12) 0.4482(3) 0.10010(14) 0.0413(7) Uani 1 1 d . . . 
H2A H 0.2108 0.5019 0.0683 0.062 Uiso 1 1 calc R . . 
H2B H 0.2133 0.3671 0.0912 0.062 Uiso 1 1 calc R . . 
H2C H 0.2287 0.4712 0.1435 0.062 Uiso 1 1 calc R . . 
C3 C 0.13101(14) 0.5809(2) 0.11513(16) 0.0483(8) Uani 1 1 d . . . 
H3A H 0.1450 0.6384 0.0907 0.072 Uiso 1 1 calc R . . 
H3B H 0.1510 0.5921 0.1614 0.072 Uiso 1 1 calc R . . 
H3C H 0.0902 0.5925 0.1057 0.072 Uiso 1 1 calc R . . 
C4 C 0.10742(13) 0.4339(3) 0.02375(13) 0.0442(7) Uani 1 1 d . . . 
H4A H 0.1148 0.4982 -0.0022 0.066 Uiso 1 1 calc R . . 
H4B H 0.0668 0.4316 0.0179 0.066 Uiso 1 1 calc R . . 
H4C H 0.1188 0.3585 0.0100 0.066 Uiso 1 1 calc R . . 
C5 C 0.18239(12) 0.3090(2) 0.22139(13) 0.0358(6) Uani 1 1 d . . . 
C6 C 0.16267(13) 0.2282(3) 0.26617(14) 0.0452(8) Uani 1 1 d . . . 
H6A H 0.1951 0.2096 0.3048 0.068 Uiso 1 1 calc R . . 
H6B H 0.1470 0.1549 0.2434 0.068 Uiso 1 1 calc R . . 
H6C H 0.1334 0.2688 0.2787 0.068 Uiso 1 1 calc R . . 
C7 C 0.23231(12) 0.2466(3) 0.20862(15) 0.0437(7) Uani 1 1 d . . . 
H7A H 0.2578 0.2128 0.2490 0.066 Uiso 1 1 calc R . . 
H7B H 0.2532 0.3039 0.1918 0.066 Uiso 1 1 calc R . . 
H7C H 0.2177 0.1834 0.1769 0.066 Uiso 1 1 calc R . . 
C8 C 0.20369(14) 0.4247(3) 0.25786(14) 0.0468(8) Uani 1 1 d . . . 
H8A H 0.2329 0.4071 0.2994 0.070 Uiso 1 1 calc R . . 
H8B H 0.1719 0.4658 0.2653 0.070 Uiso 1 1 calc R . . 
H8C H 0.2198 0.4752 0.2322 0.070 Uiso 1 1 calc R . . 
C9 C 0.05387(12) 0.3654(2) 0.15672(13) 0.0343(6) Uani 1 1 d . . . 
C10 C 0.05979(14) 0.4596(3) 0.20878(15) 0.0480(8) Uani 1 1 d . . . 
H10A H 0.0221 0.4805 0.2099 0.072 Uiso 1 1 calc R . . 
H10B H 0.0780 0.5302 0.1988 0.072 Uiso 1 1 calc R . . 
H10C H 0.0830 0.4284 0.2509 0.072 Uiso 1 1 calc R . . 
C11 C 0.00950(12) 0.4065(3) 0.09312(15) 0.0499(8) Uani 1 1 d . . . 
H11A H -0.0276 0.4137 0.0988 0.075 Uiso 1 1 calc R . . 
H11B H 0.0070 0.3485 0.0592 0.075 Uiso 1 1 calc R . . 
H11C H 0.0207 0.4833 0.0808 0.075 Uiso 1 1 calc R . . 
C12 C 0.02919(13) 0.2529(3) 0.17638(15) 0.0438(7) Uani 1 1 d . . . 
H12A H -0.0071 0.2716 0.1820 0.066 Uiso 1 1 calc R . . 
H12B H 0.0558 0.2226 0.2170 0.066 Uiso 1 1 calc R . . 
H12C H 0.0232 0.1929 0.1427 0.066 Uiso 1 1 calc R . . 
C13 C 0.09651(11) 0.0528(2) 0.10710(12) 0.0291(6) Uani 1 1 d . . . 
C14 C 0.13706(12) -0.0118(2) 0.15359(15) 0.0409(7) Uani 1 1 d . . . 
H14A H 0.1755 0.0137 0.1681 0.049 Uiso 1 1 calc R . . 
C15 C 0.12220(13) -0.1134(2) 0.17922(15) 0.0476(8) Uani 1 1 d . . . 
H15A H 0.1500 -0.1571 0.2116 0.057 Uiso 1 1 calc R . . 
C16 C 0.06694(13) -0.1495(2) 0.15707(15) 0.0416(7) Uani 1 1 d . . . 
C17 C 0.02583(12) -0.0910(2) 0.10954(14) 0.0380(7) Uani 1 1 d . . . 
H17A H -0.0121 -0.1192 0.0941 0.046 Uiso 1 1 calc R . . 
C18 C 0.04120(11) 0.0110(2) 0.08453(13) 0.0319(6) Uani 1 1 d . . . 
H18A H 0.0133 0.0530 0.0514 0.038 Uiso 1 1 calc R . . 
C19 C 0.14038(14) -0.0134(3) -0.11287(15) 0.0590(10) Uani 1 1 d . . . 
H19A H 0.1562 0.0598 -0.1235 0.089 Uiso 1 1 calc R . . 
H19B H 0.1009 -0.0220 -0.1413 0.089 Uiso 1 1 calc R . . 
H19C H 0.1627 -0.0809 -0.1188 0.089 Uiso 1 1 calc R . . 
C20 C 0.11639(14) -0.1533(3) -0.00855(17) 0.0536(9) Uani 1 1 d . . . 
H20A H 0.1176 -0.1542 0.0364 0.080 Uiso 1 1 calc R . . 
H20B H 0.1405 -0.2169 -0.0153 0.080 Uiso 1 1 calc R . . 
H20C H 0.0772 -0.1653 -0.0372 0.080 Uiso 1 1 calc R . . 
C21 C 0.21949(11) 0.0075(2) 0.02579(13) 0.0318(6) Uani 1 1 d . . . 
C22 C 0.24267(12) 0.1190(2) 0.04353(13) 0.0367(7) Uani 1 1 d . . . 
H22A H 0.2184 0.1855 0.0302 0.044 Uiso 1 1 calc R . . 
C23 C 0.29921(12) 0.1391(3) 0.07965(13) 0.0370(7) Uani 1 1 d . . . 
H23A H 0.3130 0.2172 0.0906 0.044 Uiso 1 1 calc R . . 
C24 C 0.33516(11) 0.0429(3) 0.09937(12) 0.0346(6) Uani 1 1 d . . . 
C25 C 0.31391(12) -0.0698(3) 0.08282(13) 0.0385(7) Uani 1 1 d . . . 
H25A H 0.3384 -0.1361 0.0962 0.046 Uiso 1 1 calc R . . 
C26 C 0.25757(12) -0.0868(2) 0.04706(13) 0.0373(7) Uani 1 1 d . . . 
H26A H 0.2440 -0.1652 0.0364 0.045 Uiso 1 1 calc R . . 
C27 C 0.41441(14) 0.1670(3) 0.15245(17) 0.0575(9) Uani 1 1 d . . . 
H27A H 0.4554 0.1616 0.1754 0.086 Uiso 1 1 calc R . . 
H27B H 0.3959 0.2031 0.1807 0.086 Uiso 1 1 calc R . . 
H27C H 0.4074 0.2157 0.1137 0.086 Uiso 1 1 calc R . . 
 
loop_ 
 _atom_site_aniso_label 
 _atom_site_aniso_U_11 
 _atom_site_aniso_U_22 
 _atom_site_aniso_U_33 
 _atom_site_aniso_U_23 
 _atom_site_aniso_U_13 
 _atom_site_aniso_U_12 
Pd1 0.02565(11) 0.03030(11) 0.02550(11) -0.00366(9) 0.00912(8) 0.00130(9) 
P1 0.0302(4) 0.0264(3) 0.0222(3) -0.0001(3) 0.0113(3) -0.0003(3) 
Si1 0.0368(5) 0.0379(4) 0.0381(5) -0.0125(4) 0.0159(4) -0.0013(3) 
F1 0.0661(13) 0.0367(10) 0.0834(15) 0.0146(10) 0.0268(11) -0.0067(9) 
O1 0.0350(11) 0.0443(11) 0.0291(10) -0.0094(9) 0.0119(8) 0.0037(9) 
O2 0.0352(12) 0.0612(14) 0.0398(12) 0.0078(10) 0.0078(10) 0.0074(10) 
C1 0.0454(17) 0.0309(14) 0.0299(15) 0.0057(12) 0.0187(13) 0.0010(12) 
C2 0.0468(18) 0.0392(16) 0.0445(17) 0.0033(14) 0.0241(15) -0.0068(13) 
C3 0.070(2) 0.0307(16) 0.056(2) 0.0074(14) 0.0363(18) 0.0021(15) 
C4 0.0503(19) 0.0563(19) 0.0307(16) 0.0142(14) 0.0198(14) 0.0101(15) 
C5 0.0419(16) 0.0345(15) 0.0264(14) 0.0020(12) 0.0054(12) -0.0076(13) 
C6 0.056(2) 0.0415(17) 0.0306(16) 0.0068(13) 0.0048(14) -0.0128(14) 
C7 0.0329(16) 0.0425(17) 0.0465(18) 0.0064(15) 0.0012(14) -0.0027(13) 
C8 0.058(2) 0.0461(18) 0.0328(16) -0.0046(14) 0.0102(15) -0.0187(15) 
C9 0.0367(16) 0.0372(15) 0.0350(15) -0.0023(13) 0.0202(13) 0.0012(12) 
C10 0.063(2) 0.0406(17) 0.056(2) -0.0089(15) 0.0415(18) -0.0018(15) 
C11 0.0369(17) 0.066(2) 0.0508(19) 0.0056(17) 0.0193(15) 0.0153(15) 
C12 0.0453(18) 0.0470(17) 0.0484(19) -0.0108(15) 0.0279(15) -0.0094(15) 
C13 0.0288(14) 0.0271(13) 0.0303(14) -0.0051(11) 0.0086(12) 0.0010(11) 
C14 0.0254(15) 0.0328(15) 0.056(2) -0.0032(14) 0.0019(14) -0.0012(12) 
C15 0.0428(18) 0.0321(16) 0.057(2) 0.0084(15) 0.0027(15) 0.0035(13) 
C16 0.0451(18) 0.0288(14) 0.0525(19) 0.0011(14) 0.0182(16) -0.0036(13) 
C17 0.0315(15) 0.0360(16) 0.0469(18) -0.0075(14) 0.0135(14) -0.0056(12) 
C18 0.0269(14) 0.0360(15) 0.0308(15) -0.0025(12) 0.0069(12) 0.0008(12) 
C19 0.058(2) 0.078(2) 0.044(2) -0.0249(18) 0.0214(17) 0.0038(18) 
C20 0.048(2) 0.0411(17) 0.076(2) -0.0175(17) 0.0267(18) -0.0066(15) 
C21 0.0376(16) 0.0320(14) 0.0327(15) -0.0017(12) 0.0207(13) 0.0009(12) 
C22 0.0345(16) 0.0343(15) 0.0445(17) -0.0015(13) 0.0176(14) 0.0061(12) 
C23 0.0363(17) 0.0352(15) 0.0428(17) -0.0037(13) 0.0177(14) -0.0018(13) 
C24 0.0311(15) 0.0508(18) 0.0249(14) 0.0068(13) 0.0134(12) 0.0047(13) 
C25 0.0460(18) 0.0379(16) 0.0355(16) 0.0091(13) 0.0187(14) 0.0123(14) 
C26 0.0505(19) 0.0335(15) 0.0342(16) -0.0011(12) 0.0226(14) 0.0028(13) 
C27 0.0385(19) 0.075(3) 0.051(2) -0.0008(18) 0.0046(16) -0.0074(17) 
 
_geom_special_details 
; 
 All esds (except the esd in the dihedral angle between two l.s. planes) 
 are estimated using the full covariance matrix.  The cell esds are taken 
 into account individually in the estimation of esds in distances, angles 
 and torsion angles; correlations between esds in cell parameters are only 
 used when they are defined by crystal symmetry.  An approximate (isotropic) 
 treatment of cell esds is used for estimating esds involving l.s. planes. 
; 
 
loop_ 
 _geom_bond_atom_site_label_1 
 _geom_bond_atom_site_label_2 
 _geom_bond_distance 
 _geom_bond_site_symmetry_2 
 _geom_bond_publ_flag 
Pd1 C13 1.965(3) . ? 
Pd1 O1 2.0163(17) . ? 
Pd1 P1 2.2591(7) . ? 
P1 C5 1.898(3) . ? 
P1 C9 1.902(3) . ? 
P1 C1 1.906(3) . ? 
Si1 O1 1.6063(19) . ? 
Si1 C20 1.870(3) . ? 
Si1 C19 1.875(3) . ? 
Si1 C21 1.884(3) . ? 
F1 C16 1.365(3) . ? 
O2 C24 1.370(3) . ? 
O2 C27 1.429(4) . ? 
C1 C3 1.534(4) . ? 
C1 C2 1.536(4) . ? 
C1 C4 1.547(4) . ? 
C2 H2A 0.9800 . ? 
C2 H2B 0.9800 . ? 
C2 H2C 0.9800 . ? 
C3 H3A 0.9800 . ? 
C3 H3B 0.9800 . ? 
C3 H3C 0.9800 . ? 
C4 H4A 0.9800 . ? 
C4 H4B 0.9800 . ? 
C4 H4C 0.9800 . ? 
C5 C8 1.535(4) . ? 
C5 C7 1.540(4) . ? 
C5 C6 1.542(4) . ? 
C6 H6A 0.9800 . ? 
C6 H6B 0.9800 . ? 
C6 H6C 0.9800 . ? 
C7 H7A 0.9800 . ? 
C7 H7B 0.9800 . ? 
C7 H7C 0.9800 . ? 
C8 H8A 0.9800 . ? 
C8 H8B 0.9800 . ? 
C8 H8C 0.9800 . ? 
C9 C10 1.536(4) . ? 
C9 C11 1.537(4) . ? 
C9 C12 1.539(4) . ? 
C10 H10A 0.9800 . ? 
C10 H10B 0.9800 . ? 
C10 H10C 0.9800 . ? 
C11 H11A 0.9800 . ? 
C11 H11B 0.9800 . ? 
C11 H11C 0.9800 . ? 
C12 H12A 0.9800 . ? 
C12 H12B 0.9800 . ? 
C12 H12C 0.9800 . ? 
C13 C14 1.383(4) . ? 
C13 C18 1.387(3) . ? 
C14 C15 1.385(4) . ? 
C14 H14A 0.9500 . ? 
C15 C16 1.365(4) . ? 
C15 H15A 0.9500 . ? 
C16 C17 1.367(4) . ? 
C17 C18 1.387(4) . ? 
C17 H17A 0.9500 . ? 
C18 H18A 0.9500 . ? 
C19 H19A 0.9800 . ? 
C19 H19B 0.9800 . ? 
C19 H19C 0.9800 . ? 
C20 H20A 0.9800 . ? 
C20 H20B 0.9800 . ? 
C20 H20C 0.9800 . ? 
C21 C22 1.388(4) . ? 
C21 C26 1.402(4) . ? 
C22 C23 1.389(4) . ? 
C22 H22A 0.9500 . ? 
C23 C24 1.385(4) . ? 
C23 H23A 0.9500 . ? 
C24 C25 1.382(4) . ? 
C25 C26 1.377(4) . ? 
C25 H25A 0.9500 . ? 
C26 H26A 0.9500 . ? 
C27 H27A 0.9800 . ? 
C27 H27B 0.9800 . ? 
C27 H27C 0.9800 . ? 
 
loop_ 
 _geom_angle_atom_site_label_1 
 _geom_angle_atom_site_label_2 
 _geom_angle_atom_site_label_3 
 _geom_angle 
 _geom_angle_site_symmetry_1 
 _geom_angle_site_symmetry_3 
 _geom_angle_publ_flag 
C13 Pd1 O1 94.08(9) . . ? 
C13 Pd1 P1 99.39(7) . . ? 
O1 Pd1 P1 166.51(6) . . ? 
C5 P1 C9 110.02(12) . . ? 
C5 P1 C1 108.50(12) . . ? 
C9 P1 C1 109.44(12) . . ? 
C5 P1 Pd1 118.29(9) . . ? 
C9 P1 Pd1 114.15(9) . . ? 
C1 P1 Pd1 95.08(8) . . ? 
O1 Si1 C20 114.71(12) . . ? 
O1 Si1 C19 108.58(13) . . ? 
C20 Si1 C19 107.09(16) . . ? 
O1 Si1 C21 110.38(11) . . ? 
C20 Si1 C21 108.01(14) . . ? 
C19 Si1 C21 107.82(13) . . ? 
Si1 O1 Pd1 128.52(11) . . ? 
C24 O2 C27 117.2(2) . . ? 
C3 C1 C2 107.6(2) . . ? 
C3 C1 C4 109.9(2) . . ? 
C2 C1 C4 105.1(2) . . ? 
C3 C1 P1 116.67(18) . . ? 
C2 C1 P1 111.21(18) . . ? 
C4 C1 P1 105.89(19) . . ? 
C1 C2 H2A 109.5 . . ? 
C1 C2 H2B 109.5 . . ? 
H2A C2 H2B 109.5 . . ? 
C1 C2 H2C 109.5 . . ? 
H2A C2 H2C 109.5 . . ? 
H2B C2 H2C 109.5 . . ? 
C1 C3 H3A 109.5 . . ? 
C1 C3 H3B 109.5 . . ? 
H3A C3 H3B 109.5 . . ? 
C1 C3 H3C 109.5 . . ? 
H3A C3 H3C 109.5 . . ? 
H3B C3 H3C 109.5 . . ? 
C1 C4 H4A 109.5 . . ? 
C1 C4 H4B 109.5 . . ? 
H4A C4 H4B 109.5 . . ? 
C1 C4 H4C 109.5 . . ? 
H4A C4 H4C 109.5 . . ? 
H4B C4 H4C 109.5 . . ? 
C8 C5 C7 109.0(2) . . ? 
C8 C5 C6 107.5(2) . . ? 
C7 C5 C6 107.4(2) . . ? 
C8 C5 P1 114.23(19) . . ? 
C7 C5 P1 108.71(19) . . ? 
C6 C5 P1 109.79(19) . . ? 
C5 C6 H6A 109.5 . . ? 
C5 C6 H6B 109.5 . . ? 
H6A C6 H6B 109.5 . . ? 
C5 C6 H6C 109.5 . . ? 
H6A C6 H6C 109.5 . . ? 
H6B C6 H6C 109.5 . . ? 
C5 C7 H7A 109.5 . . ? 
C5 C7 H7B 109.5 . . ? 
H7A C7 H7B 109.5 . . ? 
C5 C7 H7C 109.5 . . ? 
H7A C7 H7C 109.5 . . ? 
H7B C7 H7C 109.5 . . ? 
C5 C8 H8A 109.5 . . ? 
C5 C8 H8B 109.5 . . ? 
H8A C8 H8B 109.5 . . ? 
C5 C8 H8C 109.5 . . ? 
H8A C8 H8C 109.5 . . ? 
H8B C8 H8C 109.5 . . ? 
C10 C9 C11 109.2(2) . . ? 
C10 C9 C12 108.1(2) . . ? 
C11 C9 C12 105.7(2) . . ? 
C10 C9 P1 114.6(2) . . ? 
C11 C9 P1 108.98(18) . . ? 
C12 C9 P1 109.86(19) . . ? 
C9 C10 H10A 109.5 . . ? 
C9 C10 H10B 109.5 . . ? 
H10A C10 H10B 109.5 . . ? 
C9 C10 H10C 109.5 . . ? 
H10A C10 H10C 109.5 . . ? 
H10B C10 H10C 109.5 . . ? 
C9 C11 H11A 109.5 . . ? 
C9 C11 H11B 109.5 . . ? 
H11A C11 H11B 109.5 . . ? 
C9 C11 H11C 109.5 . . ? 
H11A C11 H11C 109.5 . . ? 
H11B C11 H11C 109.5 . . ? 
C9 C12 H12A 109.5 . . ? 
C9 C12 H12B 109.5 . . ? 
H12A C12 H12B 109.5 . . ? 
C9 C12 H12C 109.5 . . ? 
H12A C12 H12C 109.5 . . ? 
H12B C12 H12C 109.5 . . ? 
C14 C13 C18 118.7(2) . . ? 
C14 C13 Pd1 124.5(2) . . ? 
C18 C13 Pd1 116.47(19) . . ? 
C13 C14 C15 120.6(3) . . ? 
C13 C14 H14A 119.7 . . ? 
C15 C14 H14A 119.7 . . ? 
C16 C15 C14 118.8(3) . . ? 
C16 C15 H15A 120.6 . . ? 
C14 C15 H15A 120.6 . . ? 
C15 C16 F1 118.5(3) . . ? 
C15 C16 C17 122.6(3) . . ? 
F1 C16 C17 118.9(3) . . ? 
C16 C17 C18 118.0(3) . . ? 
C16 C17 H17A 121.0 . . ? 
C18 C17 H17A 121.0 . . ? 
C13 C18 C17 121.2(3) . . ? 
C13 C18 H18A 119.4 . . ? 
C17 C18 H18A 119.4 . . ? 
Si1 C19 H19A 109.5 . . ? 
Si1 C19 H19B 109.5 . . ? 
H19A C19 H19B 109.5 . . ? 
Si1 C19 H19C 109.5 . . ? 
H19A C19 H19C 109.5 . . ? 
H19B C19 H19C 109.5 . . ? 
Si1 C20 H20A 109.5 . . ? 
Si1 C20 H20B 109.5 . . ? 
H20A C20 H20B 109.5 . . ? 
Si1 C20 H20C 109.5 . . ? 
H20A C20 H20C 109.5 . . ? 
H20B C20 H20C 109.5 . . ? 
C22 C21 C26 115.1(3) . . ? 
C22 C21 Si1 119.9(2) . . ? 
C26 C21 Si1 124.9(2) . . ? 
C21 C22 C23 124.0(3) . . ? 
C21 C22 H22A 118.0 . . ? 
C23 C22 H22A 118.0 . . ? 
C24 C23 C22 118.7(3) . . ? 
C24 C23 H23A 120.7 . . ? 
C22 C23 H23A 120.7 . . ? 
O2 C24 C25 116.5(2) . . ? 
O2 C24 C23 124.2(3) . . ? 
C25 C24 C23 119.4(3) . . ? 
C26 C25 C24 120.6(3) . . ? 
C26 C25 H25A 119.7 . . ? 
C24 C25 H25A 119.7 . . ? 
C25 C26 C21 122.3(3) . . ? 
C25 C26 H26A 118.9 . . ? 
C21 C26 H26A 118.9 . . ? 
O2 C27 H27A 109.5 . . ? 
O2 C27 H27B 109.5 . . ? 
H27A C27 H27B 109.5 . . ? 
O2 C27 H27C 109.5 . . ? 
H27A C27 H27C 109.5 . . ? 
H27B C27 H27C 109.5 . . ? 
 
_diffrn_measured_fraction_theta_max    0.999 
_diffrn_reflns_theta_full              25.39 
_diffrn_measured_fraction_theta_full   0.999 
_refine_diff_density_max    0.369 
_refine_diff_density_min   -0.280 
_refine_diff_density_rms    0.062 
_publ_requested_category         FM 
 
_publ_section_references 
; 
Bruker (2004). APEX2. Bruker AXS, Inc., Madison, Wisconsin, USA. 
 
Bruker (2005). SAINT, SHELXTL, XCIF, XPREP.  Bruker AXS, Inc., Madison, 
Wisconsin, USA. 
 
Bruker (2007).  SADABS, TWINABS. Bruker AXS, Inc., Madison, Wisconsin, USA. 
 
CrystalMaker (1994).  CrystalMaker, a crystal and molecular structures 
program for Mac and Windows. CrystalMaker Software Ltd., Oxford, England 
(www.crystalmaker.com). 
 
; 
 
_publ_section_figure_captions 
; 
Figure 1.  SHELXTL (Bruker, 2005) plot showing 35% probability ellipsoids 
for non-H atoms and circles of arbitrary size for H atoms. 
; 
 
_publ_section_exptl_prep 
; 
Crystals were grown from pentane. 
; 
 
_publ_section_exptl_refinement 
; 
 
A structural model consisting of the host molecule was developed. Methyl 
H atom positions, R-CH~3~, were optimized by rotation about R-C bonds 
with idealized C-H, R--H and H--H distances.  Remaining H atoms were 
included as riding idealized contributors.  Methyl H atom U's were assigned 
as 1.5 times U~eq~ of the carrier atom; remaining H atom U's were 
assigned as 1.2 times carrier U~eq~. 
; 
 
_publ_contact_author 
; 
Danielle L. Gray 
University of Illinois 
School of Chemical Sciences, Box 59-1 
505 South Mathews Avenue 
Urbana, Illinois  61801 
USA 
; 
_publ_contact_author_phone        '1  217 244 1708' 
_publ_contact_author_fax          '1  217 244 8068' 
_publ_contact_author_email        dgray@illinois.edu 
_publ_contact_letter 
; 
Please consider this CIF submission for publication as a structural paper 
in Acta Crystallographica E. 
; 
_publ_requested_journal           'Acta Crystallographica E.' 
_publ_requested_coeditor_name     ? 
 
_publ_section_title 
; 
?
;

_publ_section_abstract 
; 
 ? 
; 
 
_publ_section_comment 
; 
 ? 
; 
 
_publ_section_acknowledgements 
; 
The Materials Chemistry Laboratory at the University of Illinois was 
supported in part by grants NSF CHE 95-03145 and NSF CHE 03-43032 
from the National Science Foundation. 
; 
 
loop_ 
 _publ_author_name 
 _publ_author_address 
'Denmark, Scott E.' 
; 
Department of Chemistry 
University of Illinois 
600 South Mathews Avenue 
Urbana, Illinois  61801 
USA
; 
'Smith, Russell C.' 
; 
Department of Chemistry 
University of Illinois 
600 South Mathews Avenue 
Urbana, Illinois  61801 
USA 
;  
'Gray, Danielle L.' 
; 
University of Illinois 
School of Chemical Sciences, Box 59-1 
505 South Mathews Avenue 
Urbana, Illinois  61801 
USA 
; 
'Gao, Yi-Gui' 
; 
University of Illinois 
School of Chemical Sciences, Box 59-1 
505 South Mathews Avenue 
Urbana, Illinois  61801 
USA 
; 
'Manor, Brian C.' 
; 
University of Illinois 
School of Chemical Sciences, Box 59-1 
505 South Mathews Avenue 
Urbana, Illinois  61801 
USA 
; 
 
loop_ 
 _exptl_crystal_face_index_h 
 _exptl_crystal_face_index_k 
 _exptl_crystal_face_index_l 
 _exptl_crystal_face_perp_dist 
    0.00    1.00    0.00    0.1330 
    0.00   -1.00    0.00    0.1140 
    0.00    0.00   -1.00    0.0390 
    0.00    0.00    1.00    0.0420 
    1.00    0.00    0.00    0.0510 
   -1.00    0.00    0.00    0.0640 
